# Supplementary material for: Application of ZFN for Site Directed Mutagenesis of Rice SSIVa Gene
Source: Springer Nature journal article supplement (doi:10.1007/s12257-017-0420-9), 2018-02-01
Supplement: 12257_2017_420_MOESM1_ESM.pdf [file 12257_2017_420_MOESM1_ESM.pdf]

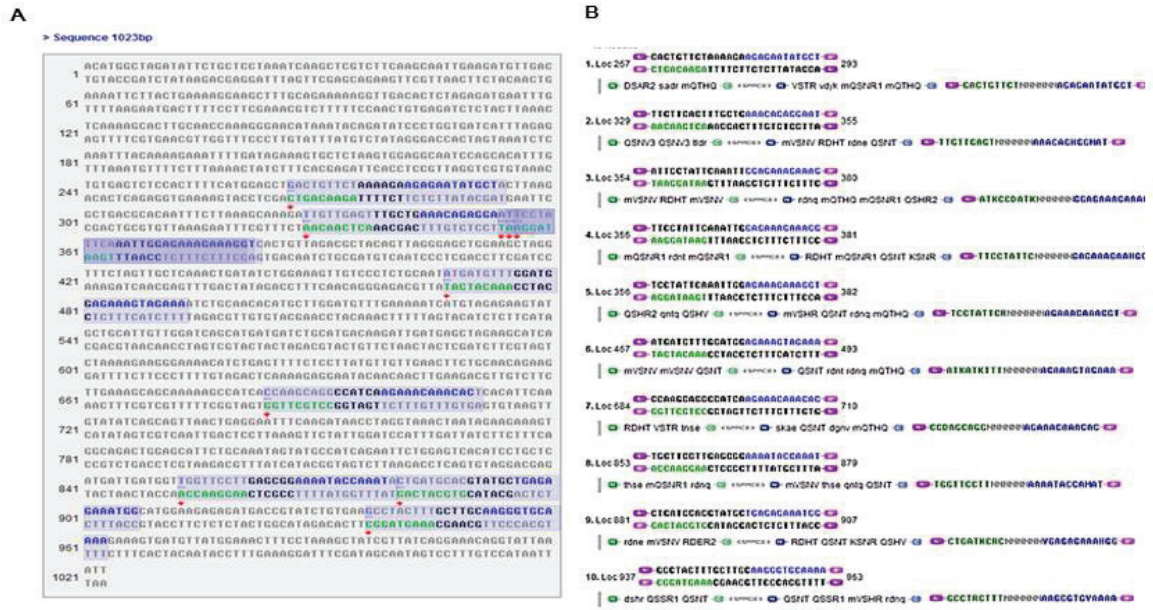

**Fig. S1.** ZFN bind to the target site. (A) Analysis of ZFN binding site in exon 4 region of *SSIVa* gene from chromosome 1 of *Oryza sativa* Japonica group. (B) Locus of ZFN binding site in exon 4 region from *SSIVa* gene.

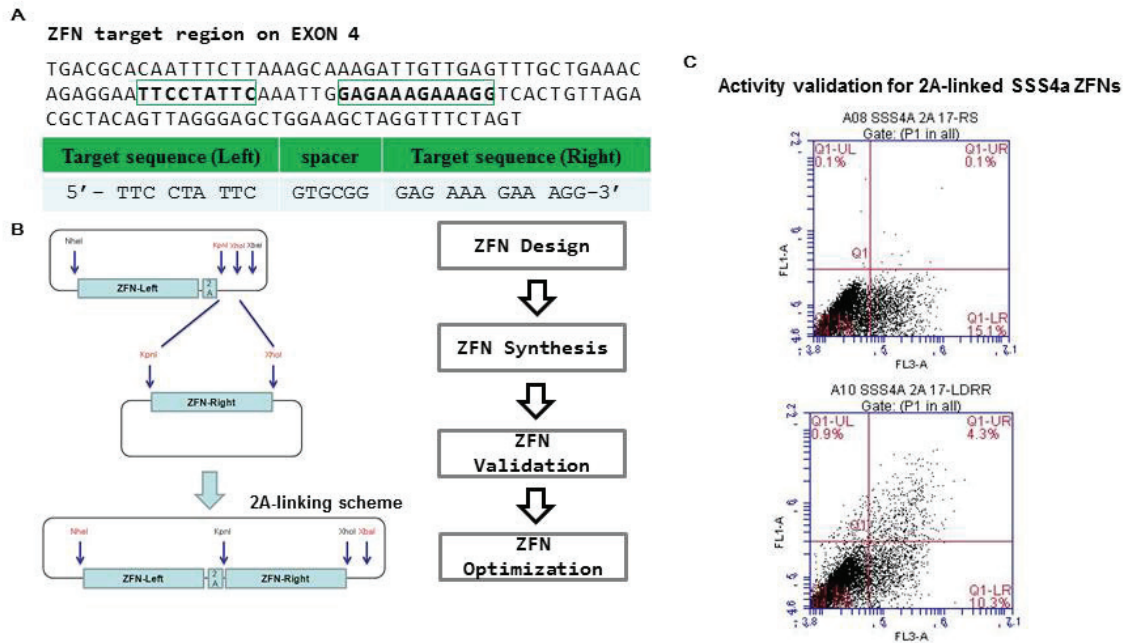

**Fig. S2.** (A) Selected locus of ZFN binding site on exon 4 region from Fig. S1. (B) ZFN vector expression system for a ZFN pair utilizing 2A-peptide. (C) Activity validation for 2A-linked *SSIVa* ZFNs.

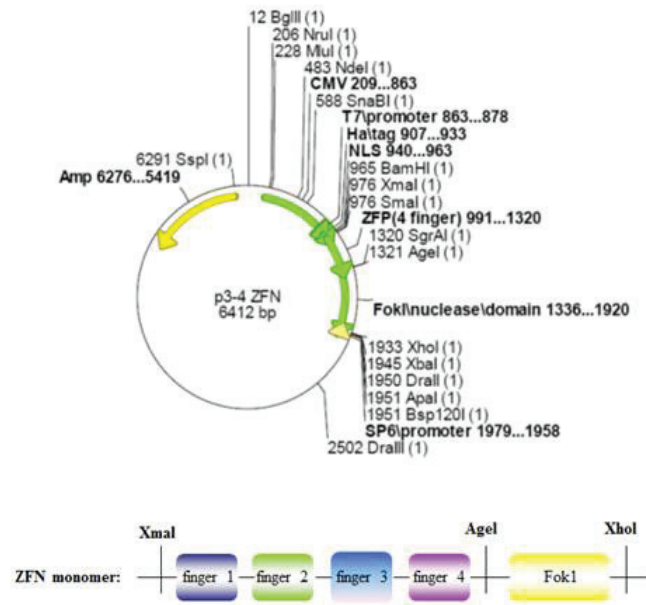

**Fig. S3.** p3-4 ZFN vector construction with finger 1, 2, 3, 4 and *FokI* site.
